# Supplementary material
Source: PubMed Central journal article supplement (PMC2557875)

Rai et al., Supplementary Figure 1

A

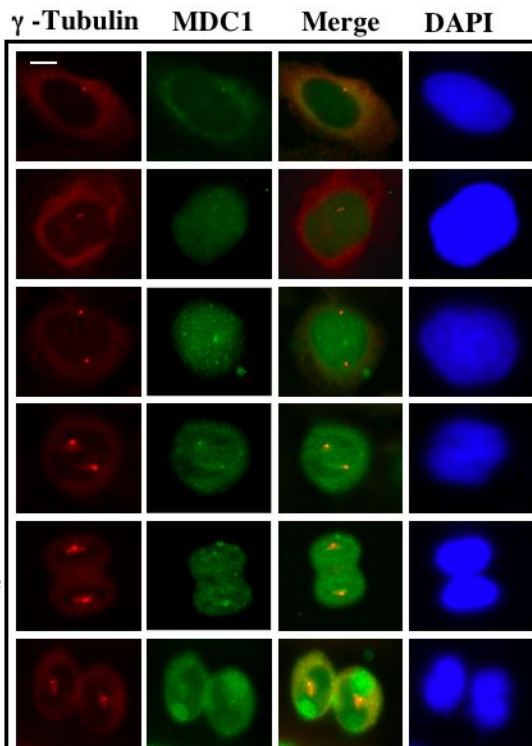

B

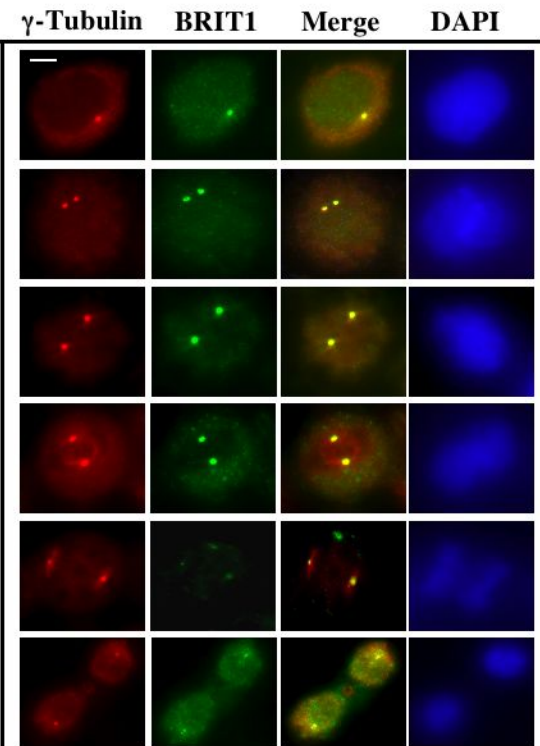

Supplement: NIHMS59392-supplement-PDF1.pdf [file NIHMS59392-supplement-PDF1.pdf]

## Rai et al., Supplementary Figure 2

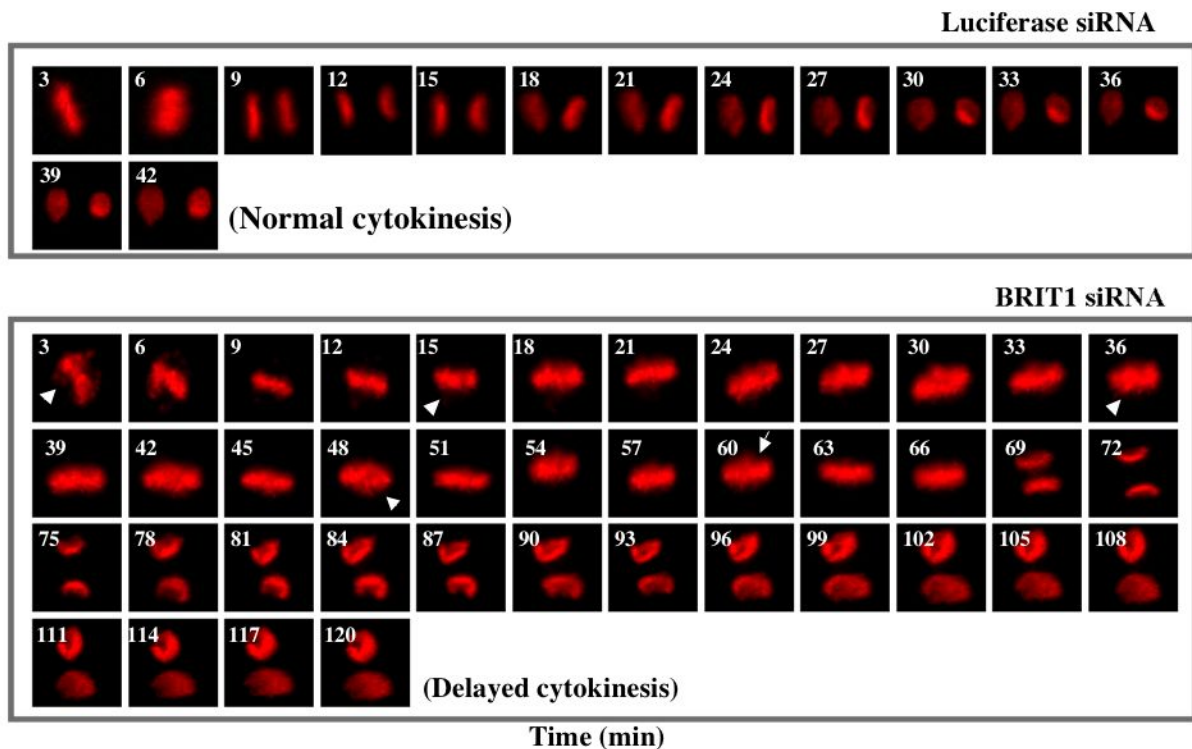

H2B-RFP U2OS stable line

Supplement: NIHMS59392-supplement-PDF2.pdf [file NIHMS59392-supplement-PDF2.pdf]
